# Supplementary material for: Lithium selenometallates of triel elements, Li5MSe4 (M = Al and Ga), aliovalent doping and their ionic conductivity
Source: Royal Society of Chemistry journal article supplement (doi:10.1039/d2dt02843c), 2022-01-01
Supplement: d2dt02843c1.pdf [file d2dt02843c1.pdf]

**Lithium Selenometallates of Triel Elements,  $\text{Li}_5\text{MSe}_4$  (M = Al and Ga),  
Aliovalent Doping and Their Ionic Conductivity**

Santhoshkumar Sundaramoorthy,<sup>a</sup> Aleksandr V. Chernatynskiy,<sup>b</sup> Nikolay Gerasimchuk<sup>c</sup>, and  
Amitava Choudhury<sup>a,\*</sup>

<sup>a</sup>Department of Chemistry, Missouri University of Science and Technology, Rolla, MO 65409, USA

<sup>b</sup>Department of Physics, Missouri University of Science and Technology, Rolla, MO 65409, USA

<sup>c</sup>Department of Chemistry, Missouri State University, Springfield, MO 65897, USA

| <b>SI No</b> | <b>Content</b>                                                                                                                                                                                              | <b>Page No</b> |
|--------------|-------------------------------------------------------------------------------------------------------------------------------------------------------------------------------------------------------------|----------------|
| Figure S1    | Photographs of hand-ground powder of compounds <b>I - IV</b> .                                                                                                                                              | S-3            |
| Figure S2    | PXRD of $\text{Li}_5\text{MSe}_4$ focusing only $2\Theta = 5$ to $25$ region.                                                                                                                               | S-4            |
| Figure S3    | PXRD of $\text{Li}_{4.66}\text{Al}_{0.82}\text{Sn}_{0.22}\text{Se}_4$ .                                                                                                                                     | S-5            |
| Figure S4    | TGA-DSC plots of compound <b>I – IV</b> .                                                                                                                                                                   | S-6            |
| Figure S5    | XPS of compound <b>III</b> and <b>IV</b> .                                                                                                                                                                  | S-7            |
| Figure S6    | Asymmetric unit of $\text{Li}_{4.66}\text{Al}_{0.82}\text{Sn}_{0.22}\text{Se}_4$ .                                                                                                                          | S-8            |
| Figure S7    | Li ion coordination in $\text{Li}_5\text{MSe}_4$ , $\text{Li}_{4.66}\text{Al}_{0.82}\text{Sn}_{0.22}\text{Se}_4$ and $\text{Li}_{4.37}\text{Ga}_{0.89}\text{Sn}_{0.24}\text{Se}_4$ .                        | S-9            |
| Figure S8    | Equivalent circuit and fitting parameters for $\text{Li}_5\text{MSe}_4$ , $\text{Li}_{4.66}\text{Al}_{0.82}\text{Sn}_{0.22}\text{Se}_4$ and $\text{Li}_{4.37}\text{Ga}_{0.89}\text{Sn}_{0.24}\text{Se}_4$ . | S-10           |
| Figure S9    | Bond valence sum maps of $\text{Li}_5\text{MSe}_4$ .                                                                                                                                                        | S-11           |
| Figure S10   | Bond valence sum maps of $\text{Li}_{4.66}\text{Al}_{0.82}\text{Sn}_{0.22}\text{Se}_4$ and $\text{Li}_{4.37}\text{Ga}_{0.89}\text{Sn}_{0.24}\text{Se}_4$ .                                                  | S-12           |
| Table S1     | Atomic coordinates and isotropic thermal displacement parameters of <b>I – IV</b> .                                                                                                                         | S-13           |
| Table S2     | Anisotropic displacement parameters of <b>I – IV</b> .                                                                                                                                                      | S-14           |
| Table S3     | Polyhedral distortion index of <b>I</b> and <b>III</b> ; and <b>II</b> and <b>IV</b> .                                                                                                                      | S-15           |

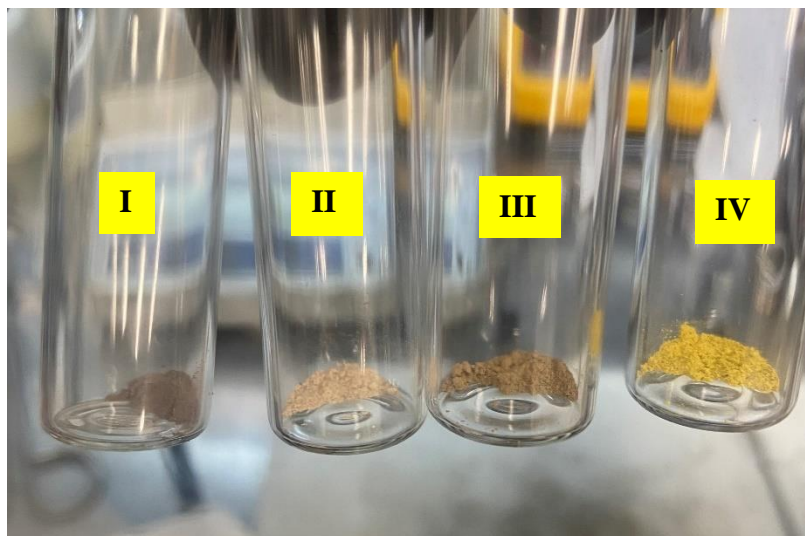

**Figure S1.** Photographs of hand-ground powder samples compounds, **I – IV**.

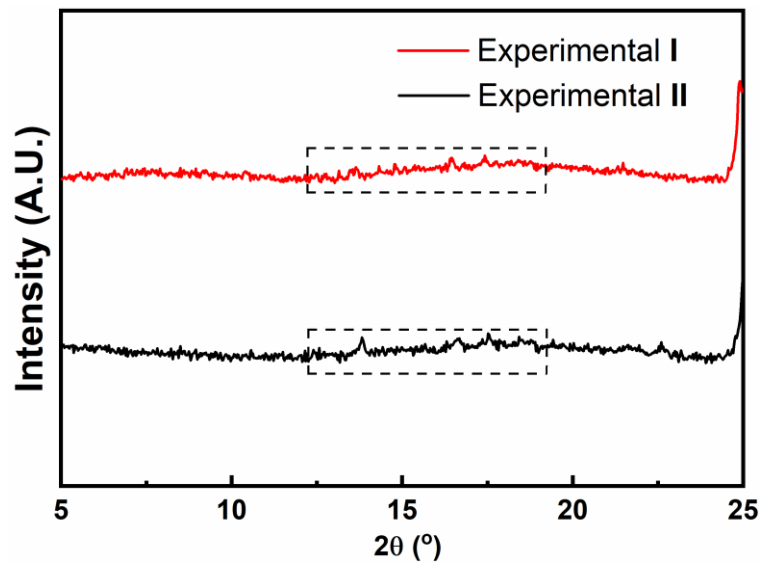

**Figure S2.** PXRd of zoomed in region of  $2\Theta = 5$  to 25 of  $\text{Li}_5\text{MSe}_4$  showing the presence of low angle lines.

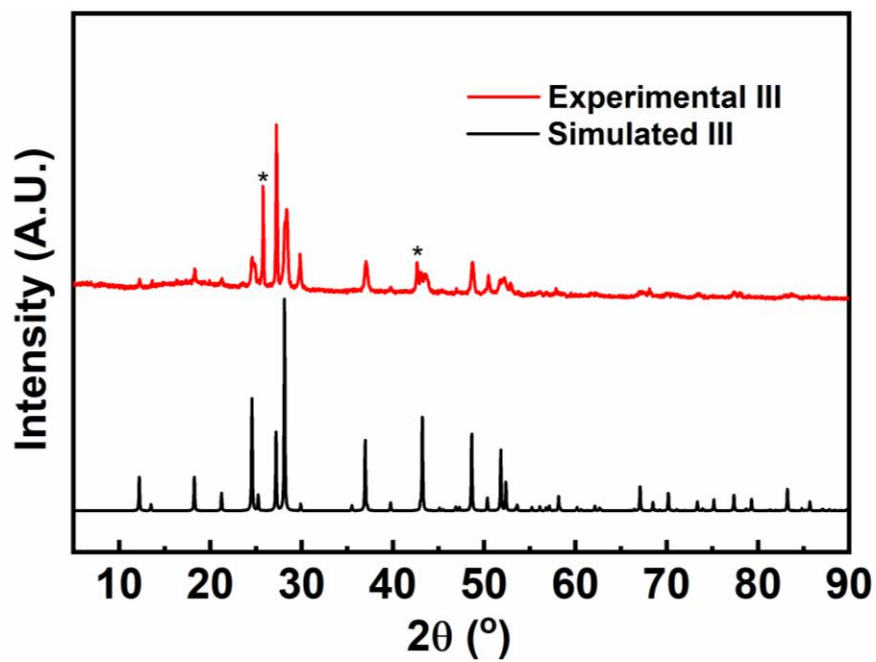

**Figure S3.** The experimental PXRD of  $\text{Li}_{4.66}\text{Al}_{0.82}\text{Sn}_{0.22}\text{Se}_4$  (III) and its comparison with the simulated pattern. Asterisks indicate presence of some unknown impurity.

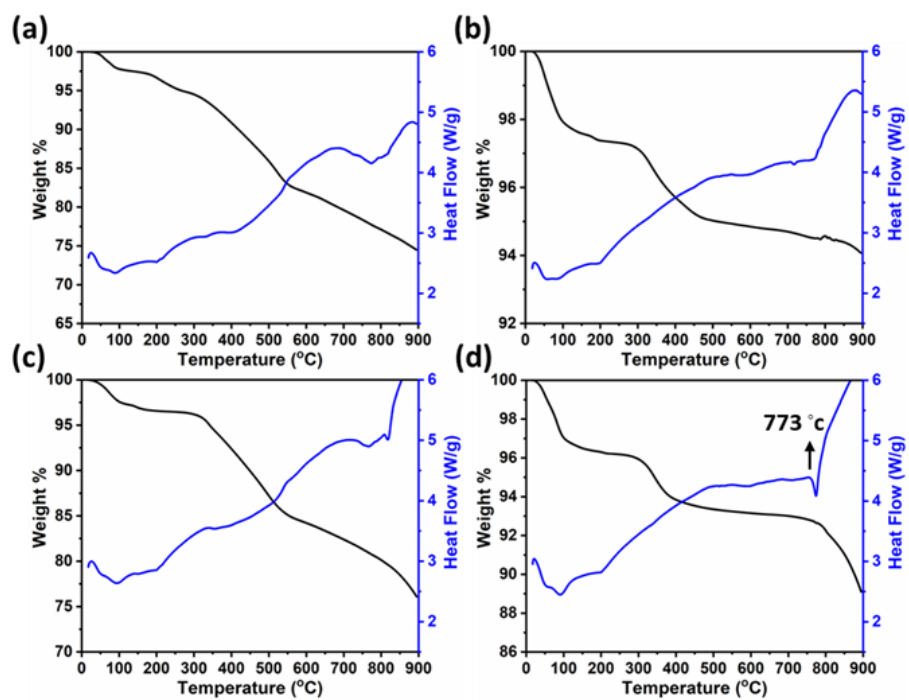

**Figure S4.** TGA-DSC curves of compound (a) **I**, (b) **II**, (c) **III**, and (d) **IV**.

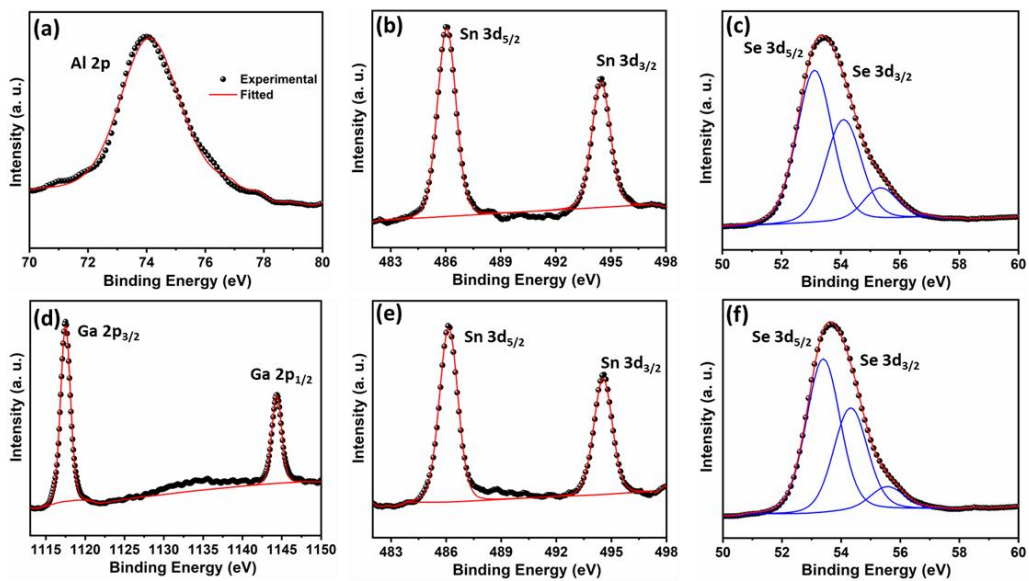

**Figure S5.** XPS spectra of compound **III** (a) Al 2p, (b) Sn 3d, (c) Se 3d and XPS spectra of compound **IV** (d) Ga 2p, (e) Sn 3d and (f) Se 3d.

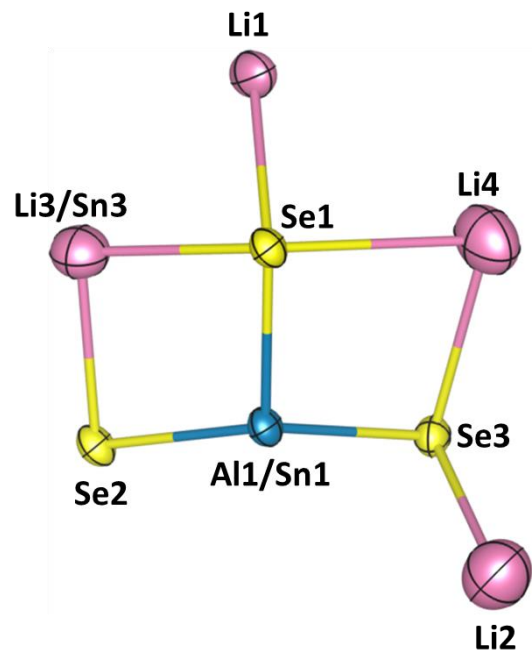

**Figure S6.** Asymmetric unit of  $\text{Li}_{4.66}\text{Al}_{0.82}\text{Sn}_{0.22}\text{Se}_4$  (III).



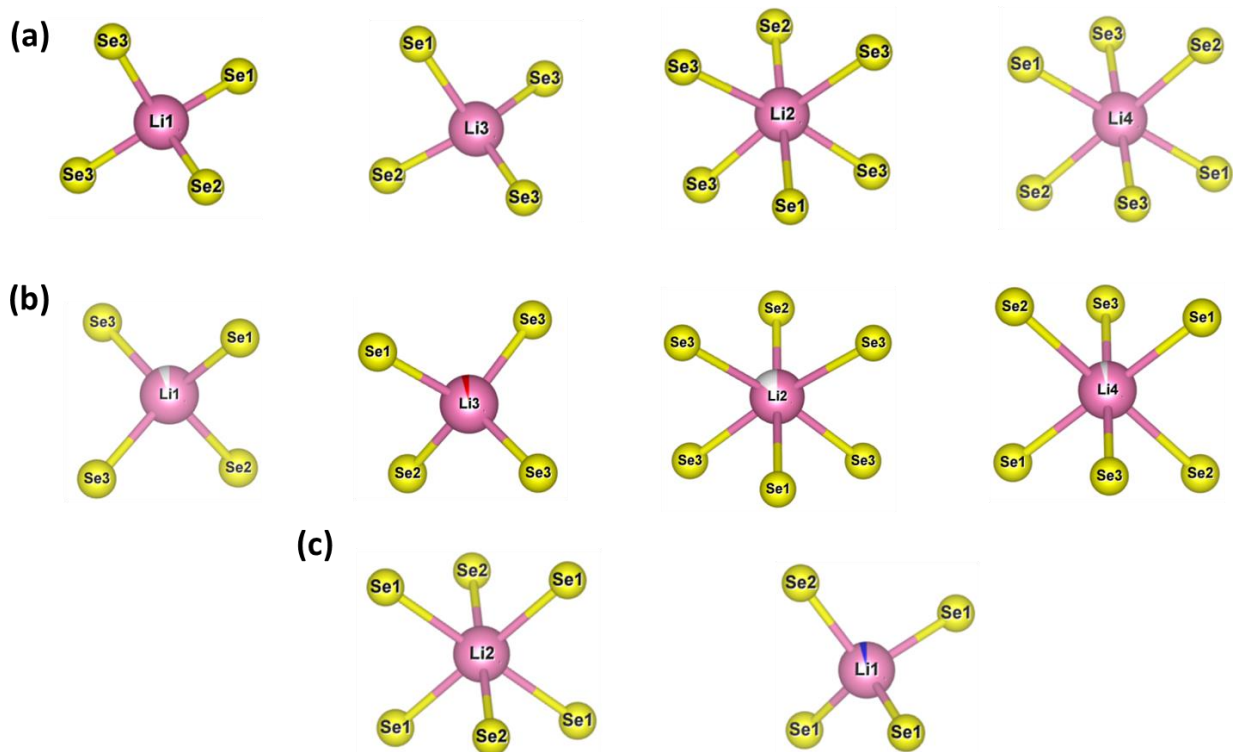

**Figure S7.** Li-ion coordination in (a)  $\text{Li}_5\text{MSe}_4$  (I and II), (b)  $\text{Li}_{4.66}\text{Al}_{0.82}\text{Sn}_{0.22}\text{Se}_4$  (III) showing vacancy creation (Li1, Li2, and Li4) and  $\text{Sn}^{4+}$  substitution (Li3 (red shade)) and (c)  $\text{Li}_{4.37}\text{Ga}_{0.89}\text{Sn}_{0.24}\text{Se}_4$  (IV) showing  $\text{Sn}^{4+}$  substitution in Li1 site and no vacancy at Li2 site.

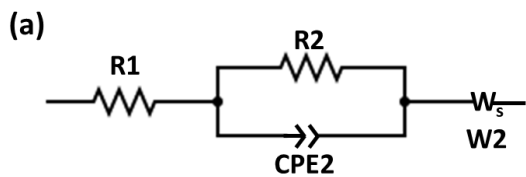

$$\begin{aligned}
 R1 &= 88.74e^{-12} \text{ ohm} \\
 Q2 &= 0.1038e^{-9} \text{ F.s}^{(a-1)} \\
 a2 &= 0.8503 \\
 R2 &= 4.102e6 \text{ Ohm} \\
 s3 &= 3.359e6 \text{ Ohm.s}^{-1/2}
 \end{aligned}$$

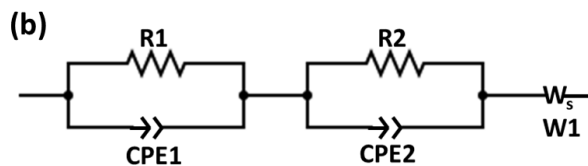

$$\begin{aligned}
 R1 &= 0.7413 \text{ Ohm} \\
 Q1 &= 4.752e9 \text{ F.s}^{(a-1)} \\
 a1 &= 0.0485 \\
 R2 &= 1.027e6 \text{ Ohm} \\
 Q2 &= 0.1661e^{-9} \text{ F.s}^{(a-1)} \\
 a2 &= 0.8382 \\
 s1 &= 681919 \text{ Ohm.s}^{-1/2}
 \end{aligned}$$

**Figure S8.** Equivalent circuit and fitting parameters for room temperature ionic conductivity of (a)  $\text{Li}_5\text{MSe}_4$  (I and II) and (b)  $\text{Li}_{4.66}\text{Al}_{0.82}\text{Sn}_{0.22}\text{Se}_4$  (III) and  $\text{Li}_{4.37}\text{Ga}_{0.89}\text{Sn}_{0.24}\text{Se}_4$  (IV).

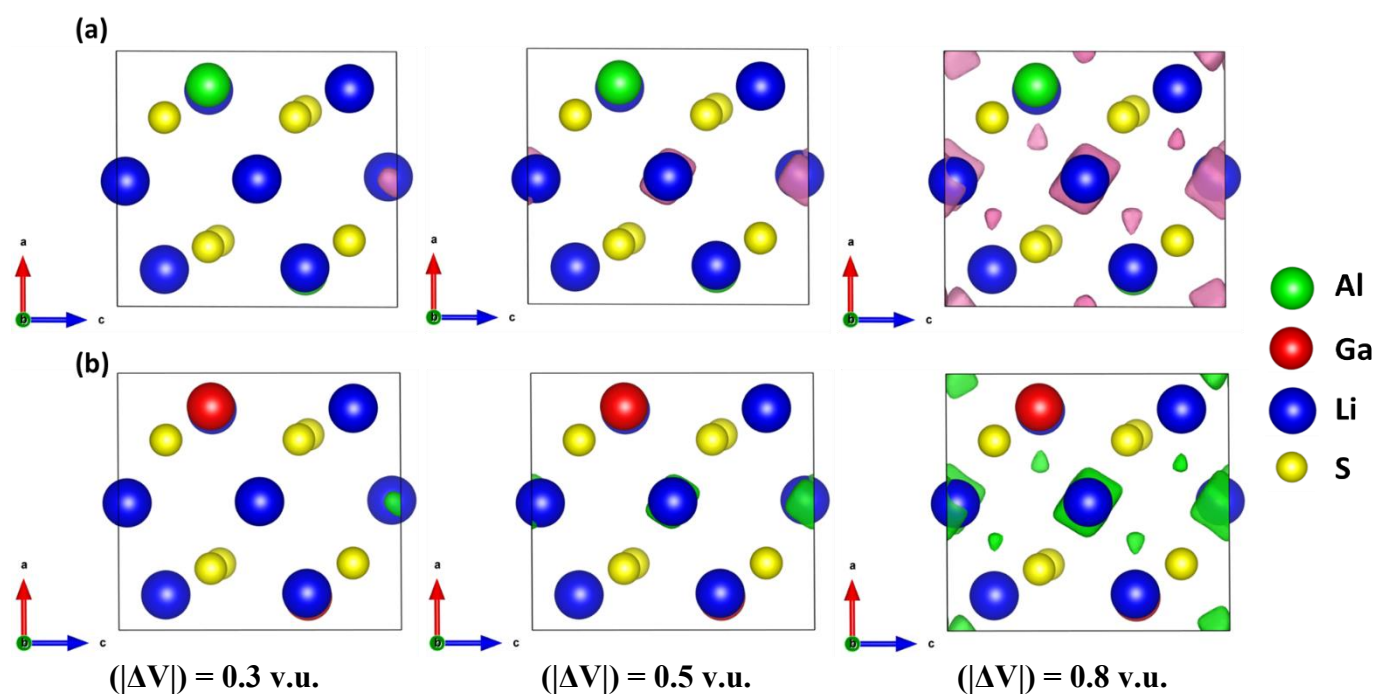

**Figure S9.** Bond valence sum maps at different  $|\Delta V|$  of (a)  $\text{Li}_5\text{AlSe}_4$  (**I**) and (b)  $\text{Li}_5\text{GaSe}_4$  (**II**).

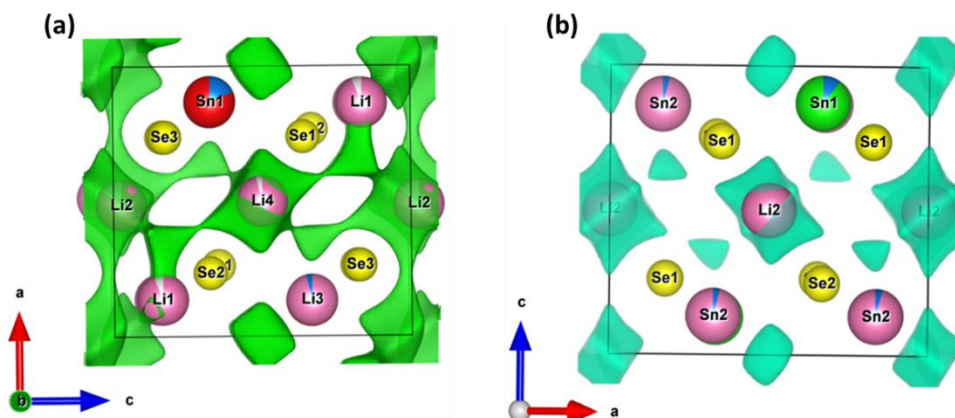

**Figure S10.** Bond valence sum ( $|\Delta V| = 1.4$  v.u.) maps of **(a)**  $\text{Li}_{4.66}\text{Al}_{0.82}\text{Sn}_{0.22}\text{Se}_4$  (**III**) and  $\text{Li}_{4.37}\text{Ga}_{0.89}\text{Sn}_{0.24}\text{Se}_4$  (**IV**).

**Table S1.** Atomic coordinates and equivalent isotropic displacement parameters of atoms for compound **I - IV**.  $U$  (eq) = 1/3 of the trace of the orthogonalized  $U_{eq}$  tensor.

| Atomic Parameters                                                             |         |           |             |            |            |                     |
|-------------------------------------------------------------------------------|---------|-----------|-------------|------------|------------|---------------------|
| Atom                                                                          | Wyckoff | Occupancy | x/a         | y/b        | z/c        | U (Å <sup>2</sup> ) |
| <b>Li<sub>5</sub>AlSe<sub>4</sub>, I</b>                                      |         |           |             |            |            |                     |
| Al1                                                                           | 2e      | 1         | 0.1328(5)   | 0.2500     | 0.6721(5)  | 0.018(1)            |
| Se1                                                                           | 2e      | 1         | 0.2572(2)   | 0.2500     | 0.3601(2)  | 0.016(1)            |
| Se2                                                                           | 2e      | 1         | -0.2340(2)  | 0.2500     | 0.6755(2)  | 0.015(1)            |
| Se3                                                                           | 4f      | 1         | 0.2593(1)   | 0.4864(1)  | 0.8291(1)  | 0.016(1)            |
| Li1                                                                           | 4f      | 1         | 0.1380(20)  | 0.4869(14) | 0.1640(20) | 0.016(3)            |
| Li2                                                                           | 2e      | 1         | 0.5150(40)  | 0.2500     | 0.9770(30) | 0.045(6)            |
| Li3                                                                           | 2e      | 1         | -0.1500(30) | 0.2500     | 0.3280(30) | 0.020(4)            |
| Li4                                                                           | 2d      | 1         | 0.5000      | 0.5000     | 0.5000     | 0.037(6)            |
| <b>Li<sub>5</sub>GaSe<sub>4</sub>, II</b>                                     |         |           |             |            |            |                     |
| Ga1                                                                           | 2e      | 1         | 0.1294(1)   | 0.2500     | 0.6708(1)  | 0.006(1)            |
| Se1                                                                           | 2e      | 1         | 0.2584(1)   | 0.2500     | 0.3594(1)  | 0.007(1)            |
| Se2                                                                           | 2e      | 1         | -0.2393(1)  | 0.2500     | 0.6742(1)  | 0.007(1)            |
| Se3                                                                           | 4f      | 1         | 0.2602(1)   | 0.4868(1)  | 0.8300(1)  | 0.007(1)            |
| Li1                                                                           | 4f      | 1         | 0.1375(15)  | 0.4880(10) | 0.1666(13) | 0.011(2)            |
| Li2                                                                           | 2e      | 1         | 0.5050(20)  | 0.2500     | 0.9690(20) | 0.033(3)            |
| Li3                                                                           | 2e      | 1         | -0.1426(17) | 0.2500     | 0.3345(15) | 0.005(2)            |
| Li4                                                                           | 2d      | 1         | 0.5000      | 0.5000     | 0.5000     | 0.024(3)            |
| <b>Li<sub>4.66</sub>Al<sub>0.82</sub>Sn<sub>0.22</sub>Se<sub>4</sub>, III</b> |         |           |             |            |            |                     |
| Al1                                                                           | 2e      | 0.82      | 0.1314(2)   | 0.2500     | 0.6717(2)  | 0.017(1)            |
| Sn1                                                                           | 2e      | 0.18      | 0.1314(2)   | 0.2500     | 0.6717(2)  | 0.017(1)            |
| Se1                                                                           | 2e      | 1         | 0.2608(1)   | 0.2500     | 0.3598(1)  | 0.018(1)            |
| Se2                                                                           | 2e      | 1         | -0.2345(1)  | 0.2500     | 0.6733(1)  | 0.019(1)            |
| Se3                                                                           | 4f      | 1         | 0.2623(1)   | 0.4876(1)  | 0.8274(1)  | 0.019(1)            |
| Li1                                                                           | 4f      | 0.94      | 0.1370(20)  | 0.4871(12) | 0.1636(17) | 0.030(3)            |
| Li2                                                                           | 2e      | 0.86      | 0.5130(40)  | 0.2500     | 0.9710(30) | 0.060(7)            |
| Li3                                                                           | 2e      | 0.96      | -0.1346(14) | 0.2500     | 0.3325(12) | 0.039(2)            |
| Sn2                                                                           | 2e      | 0.04      | -0.1346(14) | 0.2500     | 0.3325(12) | 0.039(2)            |
| Li4                                                                           | 2d      | 0.96      | 0.5000      | 0.5000     | 0.5000     | 0.055(8)            |
| <b>Li<sub>4.37</sub>Ga<sub>0.89</sub>Sn<sub>0.24</sub>Se<sub>4</sub>, IV</b>  |         |           |             |            |            |                     |
| Ga1                                                                           | 2d      | 0.893     | 0.3333      | 0.6667     | 0.1275(2)  | 0.018(1)            |
| Sn1                                                                           | 2d      | 0.107     | 0.3333      | 0.6667     | 0.1275(2)  | 0.018(1)            |
| Se1                                                                           | 6i      | 1         | 0.6507(1)   | 0.8254(1)  | 0.2613(2)  | 0.023(1)            |
| Se2                                                                           | 2d      | 1         | 0.3333      | 0.6667     | 0.7528(2)  | 0.020(1)            |
| Li1                                                                           | 6i      | 0.956     | 0.3302(7)   | 0.1651(4)  | 0.1370(14) | 0.043(2)            |
| Sn2                                                                           | 6i      | 0.044     | 0.3302(7)   | 0.1651(4)  | 0.1370(14) | 0.043(2)            |
| Li2                                                                           | 3f      | 1         | 0.5000      | 0.0000     | 0.5000     | 0.066(8)            |

**Table S2.** Anisotropic displacement parameters ( $\text{\AA}^2 \times 10^3$ ) for compound **I - IV**. The anisotropic displacement factor exponent takes the form:  $-2p^2[ h^2 a^* 2U^{11} + \dots + 2 h k a^* b^* U^{12} ]$

| Atom                                                                          | $U^{11}$ | $U^{22}$ | $U^{33}$ | $U^{23}$ | $U^{13}$ | $U^{12}$ |
|-------------------------------------------------------------------------------|----------|----------|----------|----------|----------|----------|
| <b>Li<sub>5</sub>AlSe<sub>4</sub>, I</b>                                      |          |          |          |          |          |          |
| Al1                                                                           | 10(2)    | 18(2)    | 26(2)    | 0        | -1(1)    | 0        |
| Se1                                                                           | 12(1)    | 17(1)    | 20(1)    | 0        | 2(1)     | 0        |
| Se2                                                                           | 8(1)     | 18(1)    | 20(1)    | 0        | 0(1)     | 0        |
| Se3                                                                           | 11(1)    | 17(1)    | 18(1)    | -1(1)    | -2(1)    | -2(1)    |
| Li1                                                                           | 11(7)    | 14(6)    | 23(7)    | 0(5)     | 0(6)     | -4(5)    |
| Li2                                                                           | 40(16)   | 45(16)   | 48(15)   | 0        | -15(12)  | 0        |
| Li3                                                                           | 29(11)   | 10(9)    | 20(10)   | 0        | -4(8)    | 0        |
| Li4                                                                           | 30(14)   | 44(15)   | 37(14)   | 6(9)     | 9(11)    | -24(10)  |
| <b>Li<sub>5</sub>GaSe<sub>4</sub>, II</b>                                     |          |          |          |          |          |          |
| Ga1                                                                           | 4(1)     | 13(1)    | 2(1)     | 0        | -1(1)    | 0        |
| Se1                                                                           | 6(1)     | 13(1)    | 2(1)     | 0        | 1(1)     | 0        |
| Se2                                                                           | 1(1)     | 14(1)    | 5(1)     | 0        | 0(1)     | 0        |
| Se3                                                                           | 5(1)     | 14(1)    | 3(1)     | -1(1)    | -1(1)    | -2(1)    |
| Li1                                                                           | 16(5)    | 8(4)     | 9(4)     | 0(3)     | 3(3)     | -2(3)    |
| Li2                                                                           | 14(7)    | 53(9)    | 31(7)    | 0        | -9(5)    | 0        |
| Li4                                                                           | 7(7)     | 34(8)    | 31(7)    | -3(5)    | 6(5)     | -10(5)   |
| <b>Li<sub>4.66</sub>Al<sub>0.82</sub>Sn<sub>0.22</sub>Se<sub>4</sub>, III</b> |          |          |          |          |          |          |
| Al1                                                                           | 13(1)    | 19(1)    | 19(1)    | 0        | 2(1)     | 0        |
| Sn1                                                                           | 13(1)    | 19(1)    | 19(1)    | 0        | 2(1)     | 0        |
| Se1                                                                           | 15(1)    | 18(1)    | 21(1)    | 0        | 3(1)     | 0        |
| Se2                                                                           | 15(1)    | 19(1)    | 22(1)    | 0        | 5(1)     | 0        |
| e3                                                                            | 16(1)    | 22(1)    | 19(1)    | -2(1)    | -1(1)    | -2(1)    |
| Li1                                                                           | 38(7)    | 23(5)    | 28(6)    | 1(4)     | -3(5)    | -7(4)    |
| Li2                                                                           | 65(17)   | 57(15)   | 58(15)   | 0        | -8(12)   | 0        |
| Li3                                                                           | 42(5)    | 43(5)    | 33(4)    | 0        | 3(4)     | 0        |
| Sn2                                                                           | 42(5)    | 43(5)    | 33(4)    | 0        | 3(4)     | 0        |
| Li4                                                                           | 65(17)   | 44(13)   | 58(15)   | -6(8)    | 6(12)    | -13(9)   |
| <b>Li<sub>4.37</sub>Ga<sub>0.89</sub>Sn<sub>0.24</sub>Se<sub>4</sub>, IV</b>  |          |          |          |          |          |          |
| Ga1                                                                           | 17(1)    | 17(1)    | 19(1)    | 0        | 0        | 9(1)     |
| Sn1                                                                           | 17(1)    | 17(1)    | 19(1)    | 0        | 0        | 9(1)     |
| Se1                                                                           | 23(1)    | 20(1)    | 25(1)    | -1(1)    | -2(1)    | 12(1)    |
| Se2                                                                           | 19(1)    | 19(1)    | 21(1)    | 0        | 0        | 9(1)     |
| Li1                                                                           | 40(4)    | 36(3)    | 54(5)    | -2(2)    | -3(3)    | 20(2)    |
| Sn2                                                                           | 40(4)    | 36(3)    | 54(5)    | -2(2)    | -3(3)    | 20(2)    |
| Li2                                                                           | 44(10)   | 45(12)   | 110(30)  | -24(12)  | -12(6)   | 22(6)    |

**Table S3.** Polyhedral distortion index of **I** and **III**; and **II** and **IV**.

| <b>Li<sub>5</sub>AlSe<sub>4</sub> (I)</b>  |                  | <b>Li<sub>4.66</sub>Al<sub>0.82</sub>Sn<sub>0.22</sub>Se<sub>4</sub> (III)</b> |                  |
|--------------------------------------------|------------------|--------------------------------------------------------------------------------|------------------|
| Polyhedra                                  | Distortion Index | Polyhedra                                                                      | Distortion Index |
| AlSe <sub>4</sub>                          | 0.00168          | (Al1/Sn1) AlSe <sub>4</sub>                                                    | 0.00273          |
| (Li1) LiSe <sub>4</sub>                    | 0.01148          | (Li1) LiSe <sub>4</sub>                                                        | 0.01096          |
| (Li3) LiSe <sub>4</sub>                    | 0.01790          | (Li3/Sn2) LiSe <sub>4</sub>                                                    | 0.00710          |
| (Li2) LiSe <sub>6</sub>                    | 0.05150          | (Li2) LiSe <sub>6</sub>                                                        | 0.05806          |
| (Li4) LiSe <sub>6</sub>                    | 0.02443          | (Li4) LiSe <sub>6</sub>                                                        | 0.02572          |
| <b>Li<sub>5</sub>GaSe<sub>4</sub> (II)</b> |                  | <b>Li<sub>4.37</sub>Ga<sub>0.89</sub>Sn<sub>0.24</sub>Se<sub>4</sub> (IV)</b>  |                  |
| Polyhedra                                  | Distortion Index | Polyhedra                                                                      | Distortion Index |
| GaSe <sub>4</sub>                          | 0.00307          | (Ga1/Sn1) GaSe <sub>4</sub>                                                    | 0.00002          |
| (Li1) LiSe <sub>4</sub>                    | 0.01110          | (Li1/Sn2) LiSe <sub>4</sub>                                                    | 0.00375          |
| (Li3) LiSe <sub>4</sub>                    | 0.01104          | (Li2) LiSe <sub>6</sub>                                                        | 0.01500          |
| (Li2) LiSe <sub>6</sub>                    | 0.06637          |                                                                                |                  |
| (Li4) LiSe <sub>6</sub>                    | 0.02048          |                                                                                |                  |
